# Supplementary material for: Increase in Incidence Rates and Risk Factors for Multidrug Resistant Bacteria in Septic Children: A Nationwide Spanish Cohort Study (2013–2019)
Source: MDPI journal article supplement (doi:10.3390/antibiotics12111626), 2023-11-14
Supplement: s1 [file s1]

**Table S1.** Multivariate analysis of risk factors for mortality (total septic population, MDR colonized and infected patients and MDR septic patients).

| VARIABLE                          | Total<br>(n=432) |             |             |                  | MDR colonized/Infected patients<br>(N=160) |                  |              | MDR-sepsis<br>(n=49) |             |              |              |
|-----------------------------------|------------------|-------------|-------------|------------------|--------------------------------------------|------------------|--------------|----------------------|-------------|--------------|--------------|
|                                   | OR               | CI 95%      |             | <i>p</i>         | OR                                         | CI 95%           |              | OR                   | CI 95%      |              | <i>p</i>     |
| Septic shock                      | <b>6.03</b>      | <b>2.75</b> | <b>13.2</b> | <b>&lt;0.001</b> | <b>4.32</b>                                | <b>1.33-13.9</b> | 0.15         | <b>50.7</b>          | <b>1.41</b> | <b>80.03</b> | <b>0.031</b> |
| Age < 1 year                      | 1.20             | 0.60        | 2.39        | 0.605            | 2.70                                       | 0.98-7.45        | 0.054        | 12.7                 | 0.21        | 774.1        | 0.224        |
| ATB 48 hours prior                | 1.54             | 0.71        | 3.33        | 0.272            | 0.75                                       | 0.32-2.83        | 0.944        | 5.13                 | 0.27        | 97.63        | 0.276        |
| MDR sepsis                        | 0.72             | 0.26        | 2.01        | 0.538            | 0.96                                       | 0.26-2.20        | 0.604        | -                    | -           | -            | -            |
| >10 hospital days pre-PICU        | 1.31             | 0.64        | 2.64        | 0.457            | 1.22                                       | 0.43-3.45        | 0.701        | 1.11                 | 0.04        | 30.57        | 0.951        |
| Type of patient at PICU admission | 0.56             | 0.27        | 1.15        | 0.114            | 0.54                                       | 0.18-1.61        | 0.267        | 0.05                 | 0.01        | 2.516        | 0.138        |
| PICU sepsis                       | <b>2.95</b>      | <b>1.16</b> | <b>7.47</b> | <b>0.022</b>     | 2.45                                       | 0.63-9.57        | 0.196        | 36.9                 | 0.61        | 223.7        | 0.085        |
| TPN                               | 1.34             | 0.83        | 3.40        | 0.124            | 1.49                                       | 0.49-4.50        | 0.478        | 0.31                 | 0.01        | 6.311        | 0.443        |
| Immunosuppression                 | <b>3.69</b>      | <b>1.73</b> | <b>7.88</b> | <b>0.001</b>     | <b>3.43</b>                                | <b>1.16-10.1</b> | <b>0.026</b> | 2.66                 | 0.09        | 77.74        | 0.569        |
| Previous malnutrition             | 1.68             | 1.34        | 2.79        | 0.508            | 1.17                                       | 0.37-3.66        | 0.789        | 6.45                 | 0.14        | 303.8        | 0.343        |
| Chronic illness                   | 2.06             | 0.92        | 4.64        | 0.080            | 1.97                                       | 0.65-5.93        | 0.228        | 5.96                 | 0.17        | 206.3        | 0.324        |

ATB= antibiotic, PICU= pediatric intensive care unit, TPN= total parenteral nutrition, MDR= multidrug resistant, OR= odds ratio, CI= confidence interval.
